# Supplementary material for: Effect of Disulfide Bridge on the Binding of SARS-CoV-2 Fusion Peptide to Cell Membrane: A Coarse-Grained Study
Source: PubMed Central journal article supplement — ACS Omega. 2022 Oct 6;7(41):36762–75. doi: 10.1021/acsomega.2c05079 (PMC9583636; doi:10.1021/acsomega.2c05079), 2022-10-06
Supplement: ao2c05079_si_001.pdf [file ao2c05079_si_001.pdf]

# **Effect of Disulfide Bridge on the Binding of SARS-CoV-2 Fusion Peptide to Cell Membrane: a Coarse-Grained Study**

Hujun Shen,<sup>1\*</sup> Zhenhua Wu<sup>2</sup>

1. *Guizhou Provincial Key Laboratory of Computational Nano-Material Science, Guizhou Education University, Guiyang 550018, China.*

2. *Department of Big Data and Artificial Intelligence, Guizhou Vocational Technology College of Electronics & Information, Kaili, 556000, China.*

## **Supporting Information**

---

\* Corresponding author. E-mail address: [hujun.shen@hotmail.com](mailto:hujun.shen@hotmail.com) (Hujun Shen)

**Figure S1.** CAVS CG representation for water. Four atomistic water molecules are grouped into a collective unit that contains two positively charged (CGP) particles, one van der Waals (vdW) interaction center (CGM) and one virtual site (CGN) carrying a negative charge ( $-2q$ ). The bonds formed between CGM and CGPs are constrained at a distance of  $d$  and a harmonic potential is applied to the angle CGP-CGM-CGP.

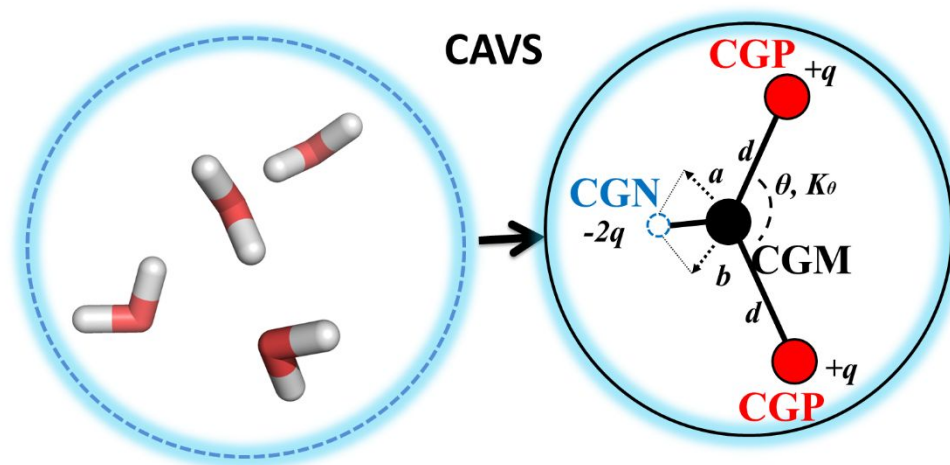

**Figure S2.** CAVS CG mapping for the (A) DOPC, (B) POPC and (C) POPE lipid models, the type name for each site is given in black color while the name for each CG unit is given in blue color accordingly. The neutral, non-interacting, positively charged, and negatively charged sites are denoted by the black filled, black open, red open or filled and blue filled circles respectively.

(A)

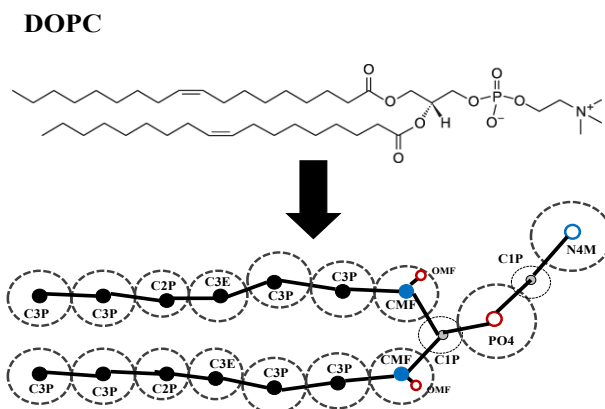

(B)

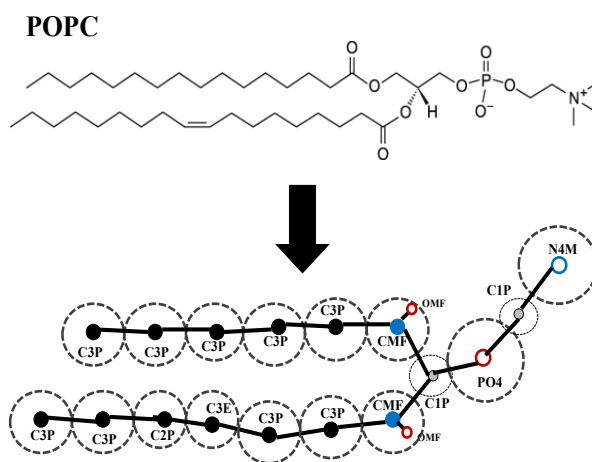

(C)

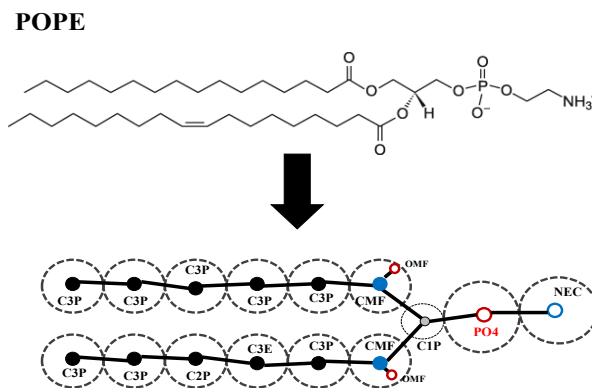

**Figure S3.** Corresponding all-atom structures of reduced CG beads in the CAVS CG model.

| all-atom structure                                                                            |               | CG bead    |
|-----------------------------------------------------------------------------------------------|---------------|------------|
| $\text{—CH}_3$                                                                                | $\Rightarrow$ | <b>C1T</b> |
| $\text{=O}$                                                                                   | $\Rightarrow$ | <b>OCN</b> |
| $\text{=C}$  | $\Rightarrow$ | <b>CON</b> |
| $\text{—NH—}$                                                                                 | $\Rightarrow$ | <b>NHC</b> |
| $\text{—NHCH}_2\text{—}$                                                                      | $\Rightarrow$ | <b>NEC</b> |
| $\text{—}\overset{\text{I}}{\text{C}}\text{—}$                                                | $\Rightarrow$ | <b>CAN</b> |
| $\text{—CH}_2\text{CH}_2\text{—}$                                                             | $\Rightarrow$ | <b>C2P</b> |
| $\text{—CH}_2\text{CH}_2\text{CH}_2\text{—}$                                                  | $\Rightarrow$ | <b>C3P</b> |
| $\text{—CH=CH—}$                                                                              | $\Rightarrow$ | <b>C2E</b> |
| $\text{—CH=CHCH}_2\text{—}$                                                                   | $\Rightarrow$ | <b>C3E</b> |
| $\text{—CH}_2\text{SH}$                                                                       | $\Rightarrow$ | <b>CMS</b> |
| $\text{—CH}_2\text{OH}$                                                                       | $\Rightarrow$ | <b>CMO</b> |
| $\text{—CH}_2\text{CH}_2\text{OH}$                                                            | $\Rightarrow$ | <b>CEO</b> |

**Figure S4.** CAVS CG mapping for the side chain analogs of 19 amino acids.

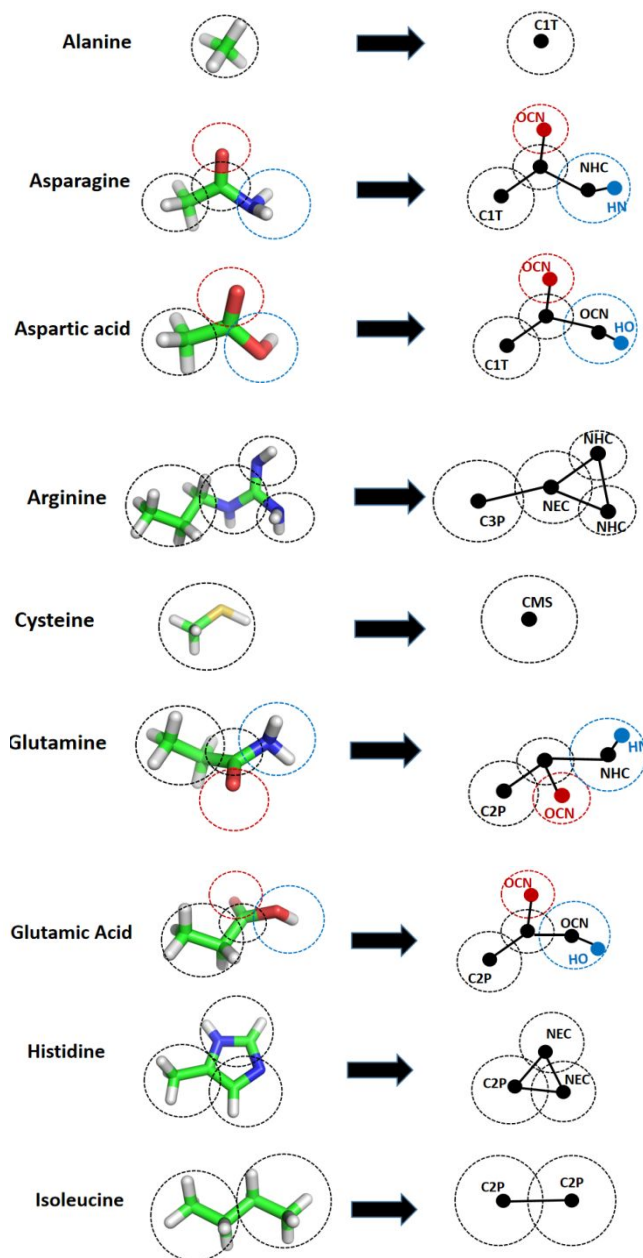

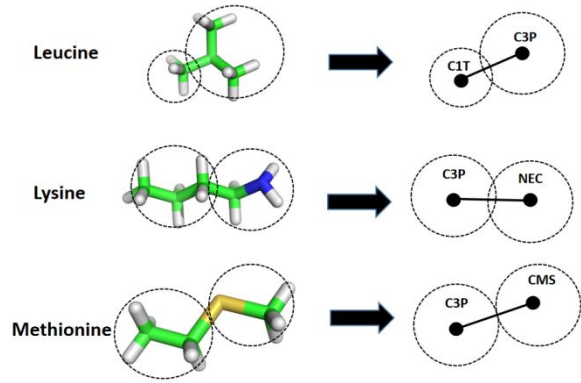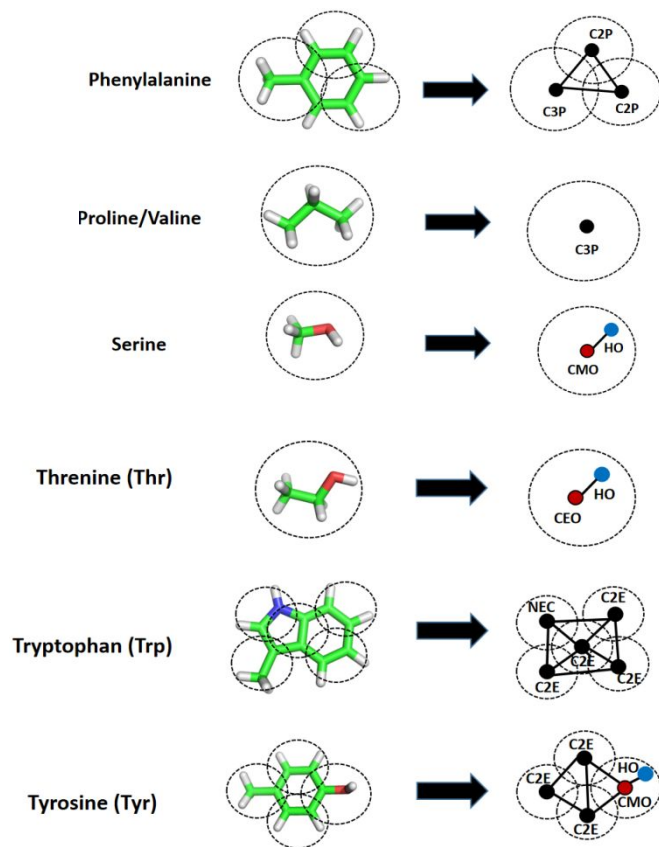

**Figure S5.** Definition of the tilt angle between the C17-C3 vector of cholesterol molecule and the bilayer normal (z-axis).

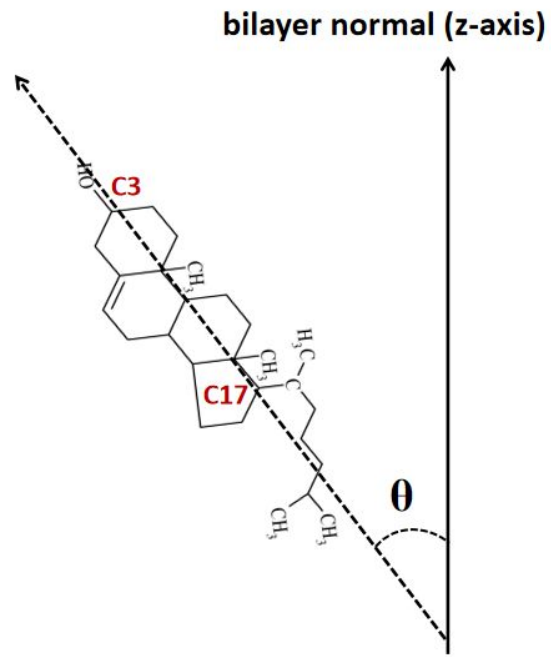



**Figure S6.** Helicity per residue for the (A) FP-S and (B) FP-L, obtained from six independent CAVS CG simulations of the FPs (FP-S and FP-L) with the POPC/cholesterol bilayer.

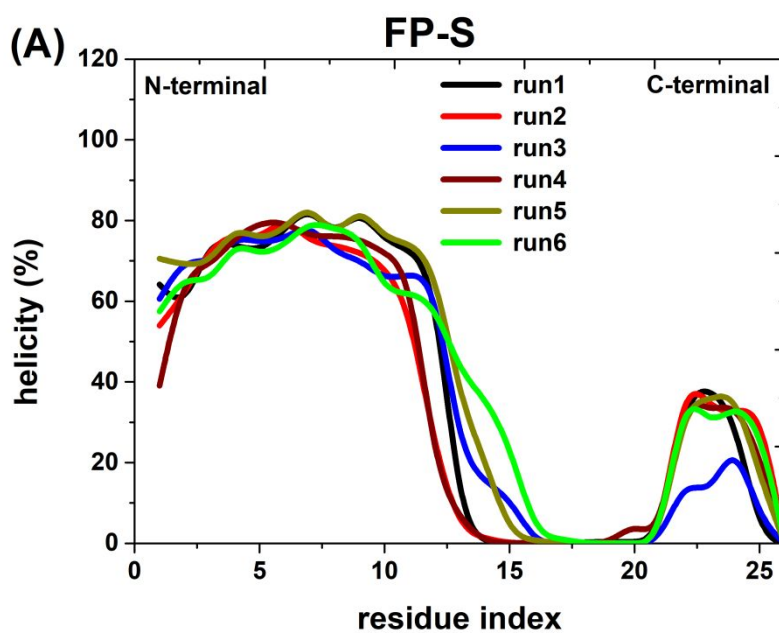

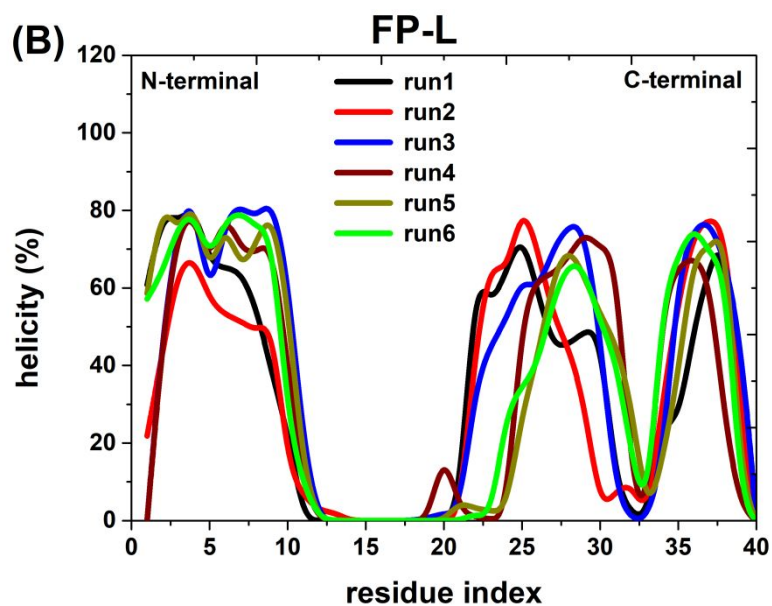

**Figure S7.** Six membrane-binding models of (A) SARS-CoV-2 FP-S and (B) SARS-CoV-2 FP-L were used for the constant-velocity pulling simulations. The FP-S (cyan) and FP-L (blue) are given in the cartoon representation and the phosphate groups in the space-filling representation.

**(A) Membrane-binding models of SARS-CoV-2 FP-S**

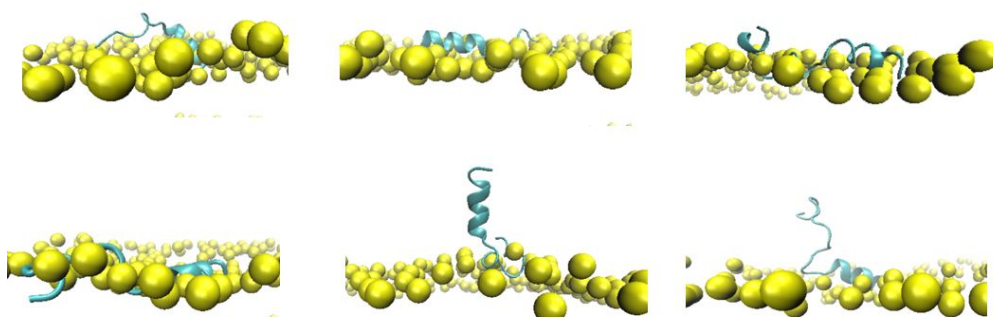

**(B) Membrane-binding models of SARS-CoV-2 FP-L**

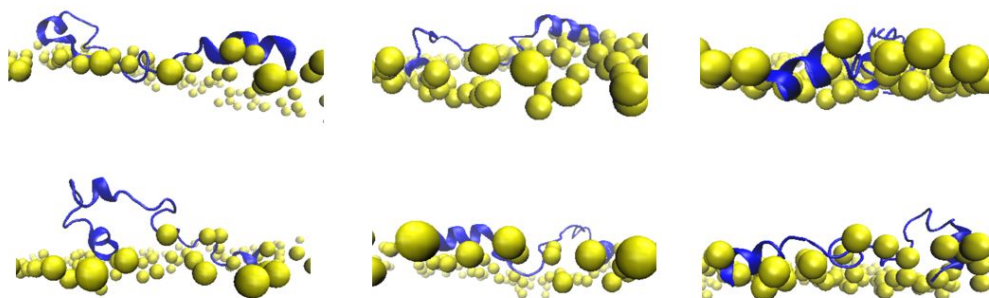

**Figure S8.** Helicity per residue for the FP-L-SS (black) and FP-L-noSS (red), calculated from the 1.0- $\mu$ s CAVS CG simulations of the FP-L with disulfide bond (FP-L-SS) and the FP-L with broken disulfide bond (FP-L-noSS) in aqueous solution (0.15 M NaCl).

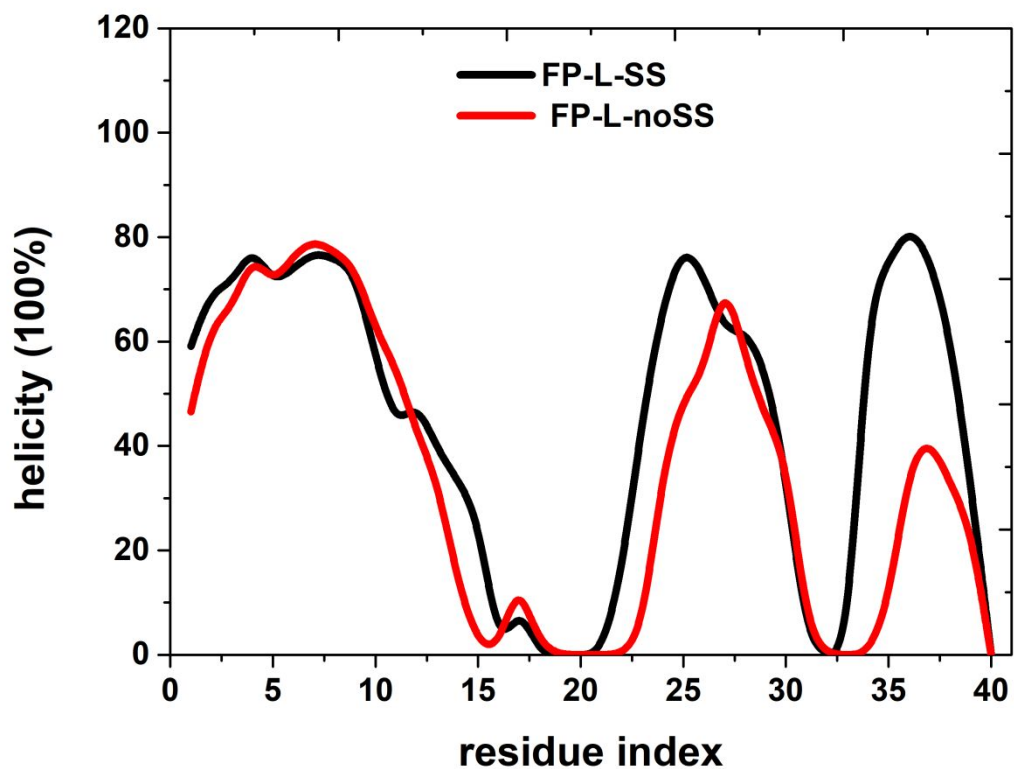

**Table S1** Constrained distances between two consecutive CG beads in the CAVS protein model.

| CG bead ( <i>i</i> ) | CG bead ( <i>j</i> ) | Distance (nm) |
|----------------------|----------------------|---------------|
| CIT                  | CON                  | 0.15          |
| CON                  | OCN                  | 0.12          |
| CON                  | NHC                  | 0.13          |
| NHC                  | CIT                  | 0.15          |

|     |     |      |
|-----|-----|------|
| CAN | C1T | 0.15 |
| CAN | C3P | 0.25 |
| CAN | C2P | 0.20 |
| CAN | C2E | 0.20 |
| CAN | CMO | 0.20 |
| CAN | CEO | 0.25 |
| CAN | CMS | 0.20 |
| C2E | NEC | 0.20 |
| NEC | NEC | 0.20 |
| C2P | C2P | 0.20 |
| C1T | C3P | 0.20 |
| C3P | NEC | 0.26 |
| C2P | CMS | 0.20 |
| C3E | C2E | 0.30 |
| C2E | C2E | 0.25 |
| C3E | C3E | 0.30 |
| C3E | NEC | 0.35 |
| C2E | CEO | 0.25 |
| C3E | CEO | 0.30 |

**Table S2.** The parameters in the angle bending potential of the CAVS CG model

| CG bead ( <i>i</i> ) | CG bead ( <i>j</i> ) | CG bead ( <i>k</i> ) | Equilibrium Angle (degree) | Force constant (kJ/mol) |
|----------------------|----------------------|----------------------|----------------------------|-------------------------|
| C1T                  | CON                  | NHC                  | 120                        | 600                     |
| C1T                  | CON                  | OCN                  | 120                        | 600                     |
| OCN                  | CON                  | NHC                  | 120                        | 600                     |
| CON                  | NHC                  | C1T                  | 120                        | 600                     |

|     |     |     |     |     |
|-----|-----|-----|-----|-----|
| NHC | CAN | C1T | 110 | 600 |
| NHC | CAN | C2P | 110 | 600 |
| NHC | CAN | C2E | 110 | 600 |
| NHC | CAN | C3P | 110 | 600 |
| HNC | CAN | CMS | 110 | 600 |
| NHC | CAN | CMO | 110 | 600 |
| NHC | CAN | CEO | 110 | 600 |
| CAN | C3P | NEC | 180 | 300 |
| CAN | C2E | NEC | 120 | 300 |
| CAN | C2P | C2P | 110 | 300 |
| CAN | C1T | C2P | 110 | 300 |
| CAN | C3P | NEC | 180 | 300 |
| CAN | C2P | CMS | 180 | 300 |
| CAN | C3E | C2E | 120 | 600 |

**Table S3.** The parameters in the dihedral angle potential of the CAVS CG model.

| CG bead<br>( <i>i</i> ) | CG bead<br>( <i>j</i> ) | CG bead<br>( <i>k</i> ) | CG bead<br>( <i>l</i> ) | Equilibrium<br>value (degree) | Force<br>constant<br>(kJ/mol) | multitude |
|-------------------------|-------------------------|-------------------------|-------------------------|-------------------------------|-------------------------------|-----------|
| C1T                     | CON                     | NHC                     | C1T                     | 180                           | 20                            | 2         |

|     |     |     |     |     |     |   |
|-----|-----|-----|-----|-----|-----|---|
| OCN | CON | NHC | C1T | 180 | 20  | 2 |
| CAN | NHC | C1T | CON | -30 | 16  |   |
| CON | C1T | OCN | NHC | 0   | 100 |   |
| CON | CAN | OCN | NHC | 0   | 100 |   |
| CON | NHC | CAN | CON | 0   | 2.5 | 3 |
| CON | NHC | CAN | CON | 0   | 1.5 | 1 |
| CON | NHC | CAN | CON | 180 | 3.0 | 2 |
| CON | NHC | CAN | CON | 180 | 6.0 | 1 |
| NHC | CAN | CON | NHC | 0   | 1.0 | 3 |
| NHC | CAN | CON | NHC | 0   | 4.1 | 1 |
| NHC | CAN | CON | NHC | 180 | 2.1 | 2 |
| NHC | CAN | CON | NHC | 180 | 4.0 | 1 |

**Table S4** Pair-wise vdW parameters for various CG types in the CAVS protein model.

| CG Type ( <i>i</i> ) | CG Type ( <i>j</i> ) | Range parameter $\sigma$ (nm) | Well depth $\epsilon$ (kJ/mol) |
|----------------------|----------------------|-------------------------------|--------------------------------|
| C1T                  | C1T                  | 0.39                          | 1.00                           |
| CON                  | CON                  | 0.34                          | 0.36                           |
| OCN                  | OCN                  | 0.30                          | 0.9                            |

|     |     |       |      |
|-----|-----|-------|------|
| NHC | NHC | 0.32  | 0.7  |
| CGW | CGW | 0.485 | 4.5  |
| PO4 | PO4 | 0.50  | 5.0  |
| N4M | N4M | 0.52  | 4.5  |
| CMF | CMF | 0.45  | 4.8  |
| C1T | C1T | 0.39  | 1.0  |
| C2P | C2P | 0.44  | 1.5  |
| C3P | C3P | 0.47  | 2.5  |
| C2E | C2E | 0.40  | 1.5  |
| C3E | C3E | 0.47  | 2.2  |
| NEC | NEC | 0.43  | 3.3  |
| CMS | CMS | 0.44  | 2.0  |
| CEO | CEO | 0.46  | 5.5  |
| CMO | CMO | 0.40  | 5.0  |
| NA  | NA  | 0.33  | 0.01 |
| CL  | CL  | 0.44  | 0.50 |
| CGW | C1T | 0.42  | 1.2  |
| CGW | CON | 0.42  | 1.2  |
| CGW | OCN | 0.40  | 5.0  |
| CGW | NHC | 0.42  | 5.0  |
| CGW | C3P | 0.47  | 2.2  |
| CGW | C2P | 0.45  | 1.5  |
| CGW | C3E | 0.47  | 2.3  |
| CGW | C2E | 0.46  | 2.1  |
| CGW | PO4 | 0.48  | 7.5  |
| CGW | N4M | 0.48  | 5.5  |
| CGW | CMF | 0.48  | 4.2  |
| CGW | CMO | 0.45  | 4.9  |
| CGW | CEO | 0.46  | 5.1  |
| CGW | CMS | 0.43  | 3.0  |
| CEO | CEO | 0.46  | 5.5  |
| CEO | C1T | 0.42  | 1.2  |
| CEO | CON | 0.41  | 1.0  |
| CEO | OCN | 0.40  | 4.0  |
| CEO | NHC | 0.41  | 5.0  |
| C3P | C3P | 0.47  | 2.5  |
| C3P | C1T | 0.44  | 1.5  |
| C3P | CON | 0.42  | 1.0  |
| C3P | OCN | 0.41  | 1.0  |
| C3P | NHC | 0.43  | 1.5  |
| C3P | NEC | 0.46  | 2.3  |
| C1T | CON | 0.38  | 0.4  |
| C1T | OCN | 0.36  | 0.4  |



|     |     |      |     |
|-----|-----|------|-----|
| C1T | NHC | 0.38 | 0.6 |
| C1T | NEC | 0.42 | 0.9 |
| NEC | CON | 0.42 | 0.9 |
| NEC | OCN | 0.40 | 3.0 |
| NEC | NHC | 0.42 | 3.0 |
| C1T | PO4 | 0.42 | 1.0 |
| CON | PO4 | 0.42 | 1.0 |
| OCN | PO4 | 0.40 | 4.5 |
| NHC | PO4 | 0.42 | 4.5 |
| NEC | PO4 | 0.46 | 4.7 |
| C1T | N4M | 0.42 | 1.5 |
| CON | N4M | 0.42 | 1.5 |
| OCN | N4M | 0.40 | 3.5 |
| NHC | N4M | 0.42 | 3.5 |
| NEC | N4M | 0.46 | 4.7 |
| C1T | CMF | 0.42 | 1.2 |
| CON | CMF | 0.42 | 1.0 |
| OCN | CMF | 0.40 | 3.5 |
| NHC | CMF | 0.42 | 3.5 |
| NEC | CMF | 0.46 | 4.5 |

**Table S5.** The partial charges used for the electrostatic interaction sites in the CAVS CG particles

| CG particle<br>(Amino acid) | Electrostatic interaction sites | Partial charge |
|-----------------------------|---------------------------------|----------------|
| OCN                         | OCN                             | -0.35          |

|              |     |       |
|--------------|-----|-------|
| NHC          | HN  | 0.35  |
| NHC<br>(Arg) | NHC | 0.50  |
| NEC<br>(Lys) | NEC | 1.0   |
| CEO<br>(Thr) | CMO | 0.35  |
| CEO<br>(Thr) | OH  | -0.35 |
| CEO<br>(Thr) | CEO | 0.35  |
| CEO<br>(Thr) | OH  | -0.35 |
| CEO<br>(Tyr) | CEO | 0.24  |
| CEO<br>(Tyr) | OH  | -0.24 |
